# Supplementary material
Source: Springer Nature journal article supplement (https://www.springermedizin.de/resource/supplementary/12937_2013_757_MOESM5_ESM.pdf/25653992)
Supplement: MOESM5 [file 25653992]

## Natural and synthetic ligands of PPAR $\alpha$ , $\beta/\delta$ , and $\gamma$

### PPAR $\alpha$

#### Natural ligands:

- Unsaturated fatty acids
- Leukotriene B4
- 8-hydroxy-eicosatetraenoic acid

#### Synthetic ligands:

- Fenofibrate
- Clofibrate
- Gemfibrozil

### PPAR $\beta/\delta$

#### Natural ligands:

- Unsaturated fatty acids
- Carbaprostacyclin
- Components of VLDL

#### Synthetic ligands:

- GW501516

### PPAR $\gamma$

#### Natural ligands:

- Unsaturated fatty acids
- 15-hydroxy-eicosatetraenoic acid
- 9- and 13-hydroxy-octadecadienoic acid
- 15-deoxy  $\Delta$ 12,14-prostaglandin J2
- prostaglandin PGJ<sub>2</sub>

#### Synthetic ligands:

- rosiglitazone
- pioglitazone
- troglitazone
- ciglitazone
- farglitazar
- S26948
- INT131
